# Supplementary material for: A new reflowing strategy based on lithiophilic substrates towards smooth and stable lithium metal anodes
Source: Royal Society of Chemistry journal article supplement (doi:10.1039/c9ta05503g), 2019-01-01
Supplement: c9ta05503g1.pdf [file c9ta05503g1.pdf]

Electronic Supplementary Material (ESI) for Journal of Materials Chemistry A  
This journal is © Royal Society of Chemistry 2018

## Supplementary Information

### New Reflowing Strategy Based on Lithiophilic Substrate towards Smooth and Stable Lithium Metal Anode

Rensheng Song<sup>a</sup>, Yuqiang Ge<sup>b</sup>, Bo Wang<sup>a,\*</sup>, Qiang Lv<sup>a</sup>, Fei Wang<sup>a</sup>, Tingting Ruan<sup>a</sup>,  
Dianlong Wang<sup>a,\*</sup>, Shixue Dou<sup>c</sup>, Huakun Liu<sup>c</sup>

<sup>a</sup> *MIIT Key Laboratory of Critical Materials Technology for New Energy Conversion and Storage, School of Chemistry and Chemical Engineering, Harbin Institute of Technology, 150001 Harbin, China.*

<sup>b</sup> *State Key Laboratory of Advanced Welding and Joining, Harbin Institute of Technology, Harbin 150001, China.*

<sup>c</sup> *Institute for Superconducting & Electronic Materials, Australian Institute of Innovative Materials, University of Wollongong, Wollongong, NSW 2500, Australia.*

*\* Corresponding author. Fax: +86 45186413721; Tel: +86 45186413751.*

*E-mail address:*

[wangbo19880804@163.com](mailto:wangbo19880804@163.com) (B. Wang),

[wangdianlonghit@163.com](mailto:wangdianlonghit@163.com) (D. L. Wang)

## Figures

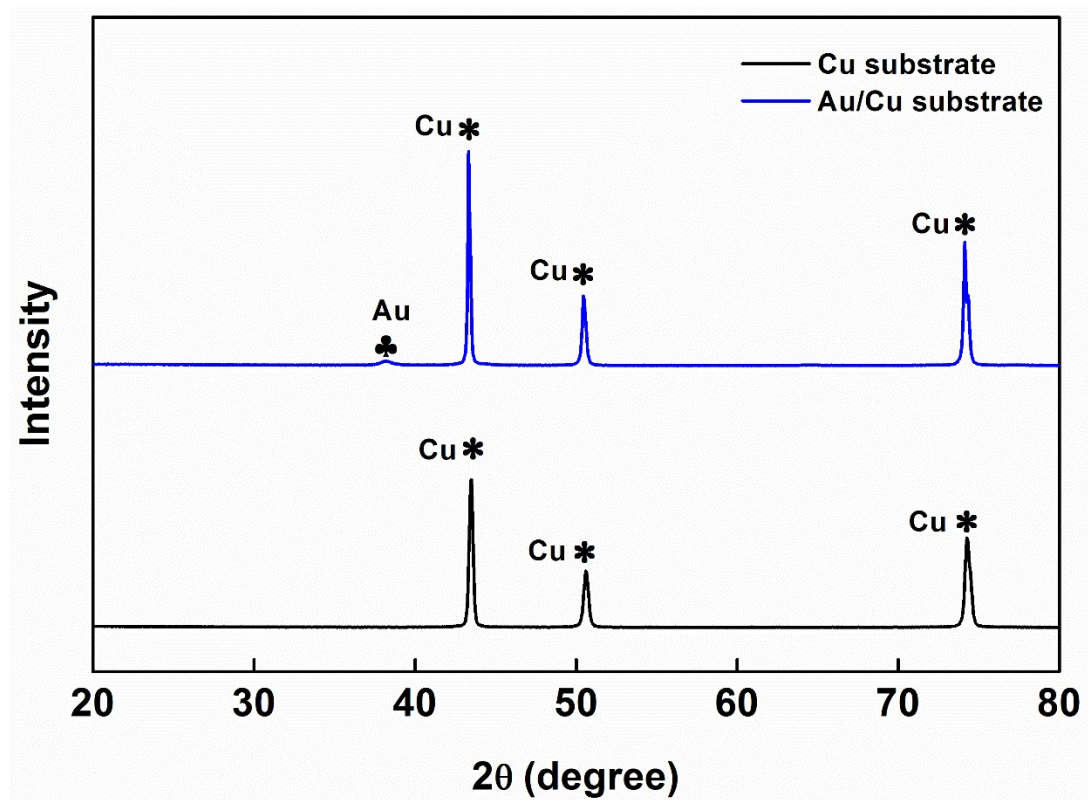

Fig. S1† XRD patterns of Cu and Au/Cu substrates.

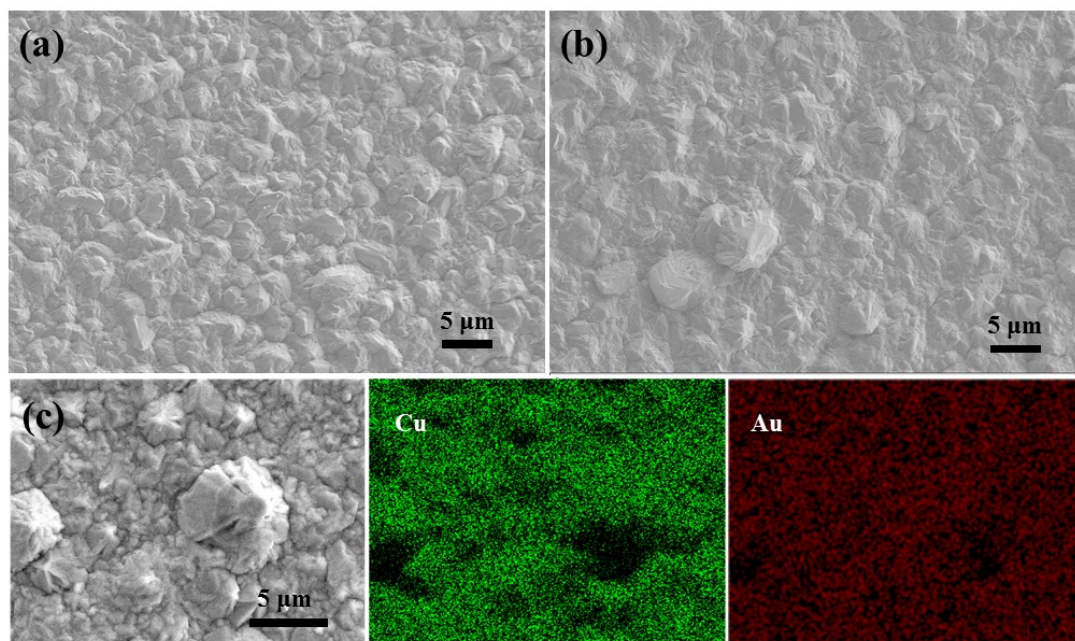

**Fig. S2†** SEM images of (a) Cu and (b) Au/Cu substrates. (c) The energy dispersive X-ray spectrometer (EDS) mapping for the distribution of carbon and golden elements on the surface of Au/Cu substrate.

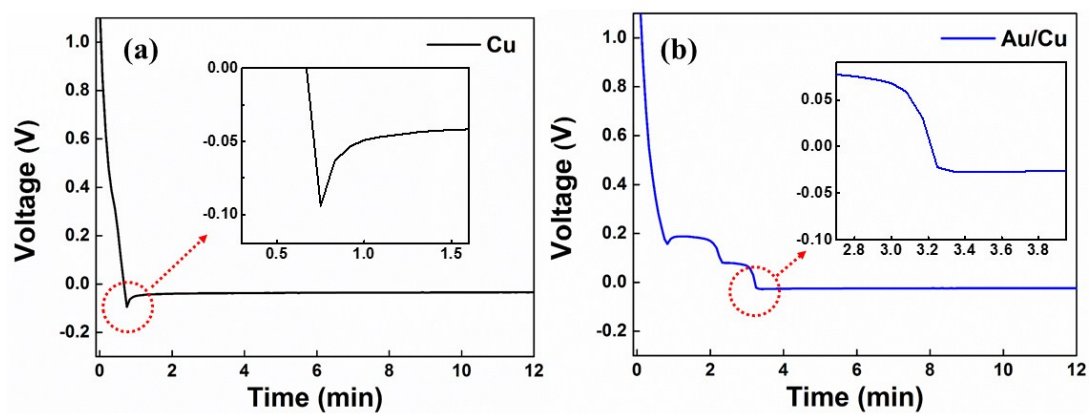

**Fig. S3†** Voltage profiles during initial Li deposition at 0.5 mA cm<sup>-2</sup> onto a) Cu and b) Au/Cu substrates. Insets in (a) and (b) are the corresponding magnified images.

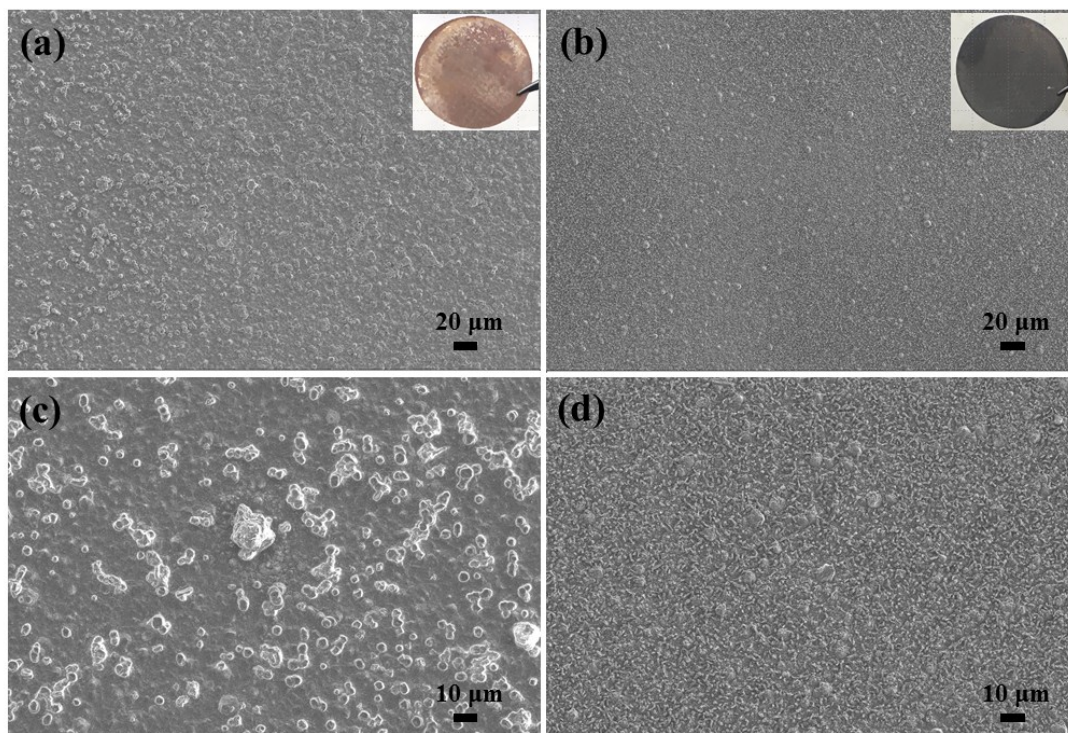

**Fig. S4†** SEM images of (a, c) Cu and (b, d) Au/Cu substrates with  $0.1 \text{ mAh cm}^{-2}$  Li deposition under the current density of  $0.5 \text{ mA cm}^{-2}$ . Insets are their corresponding digital photographs, with each electrode having the diameter of 14 mm.

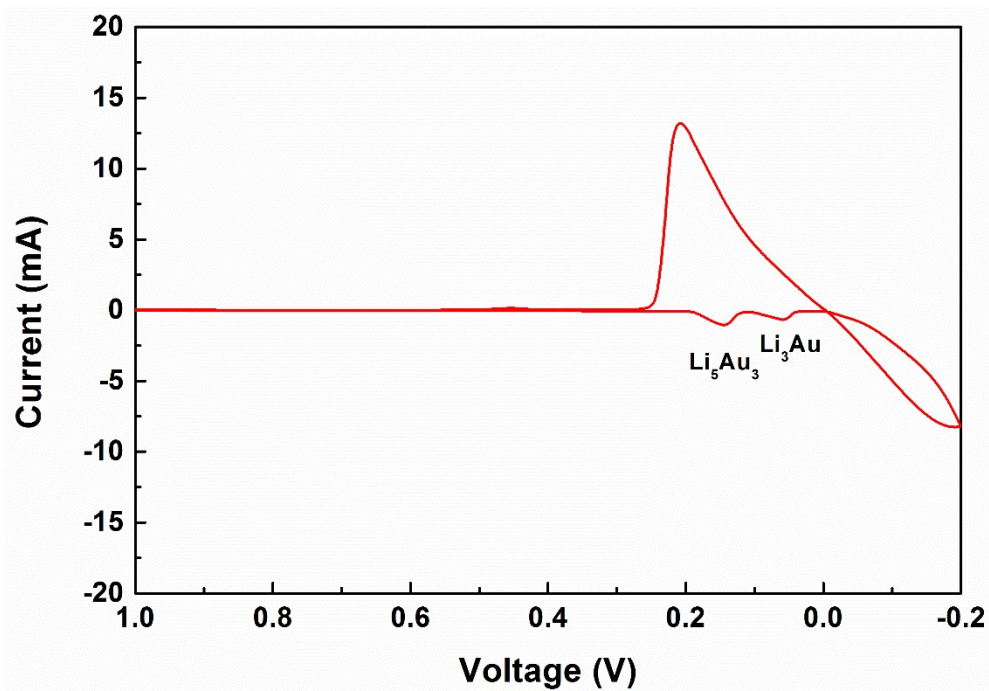

Fig. S5† The CV measurements of the half cell with Au/Cu electrode were conducted with a potential window from +1V to -0.2 V at a scan rate of 0.5 mV s<sup>-1</sup>.

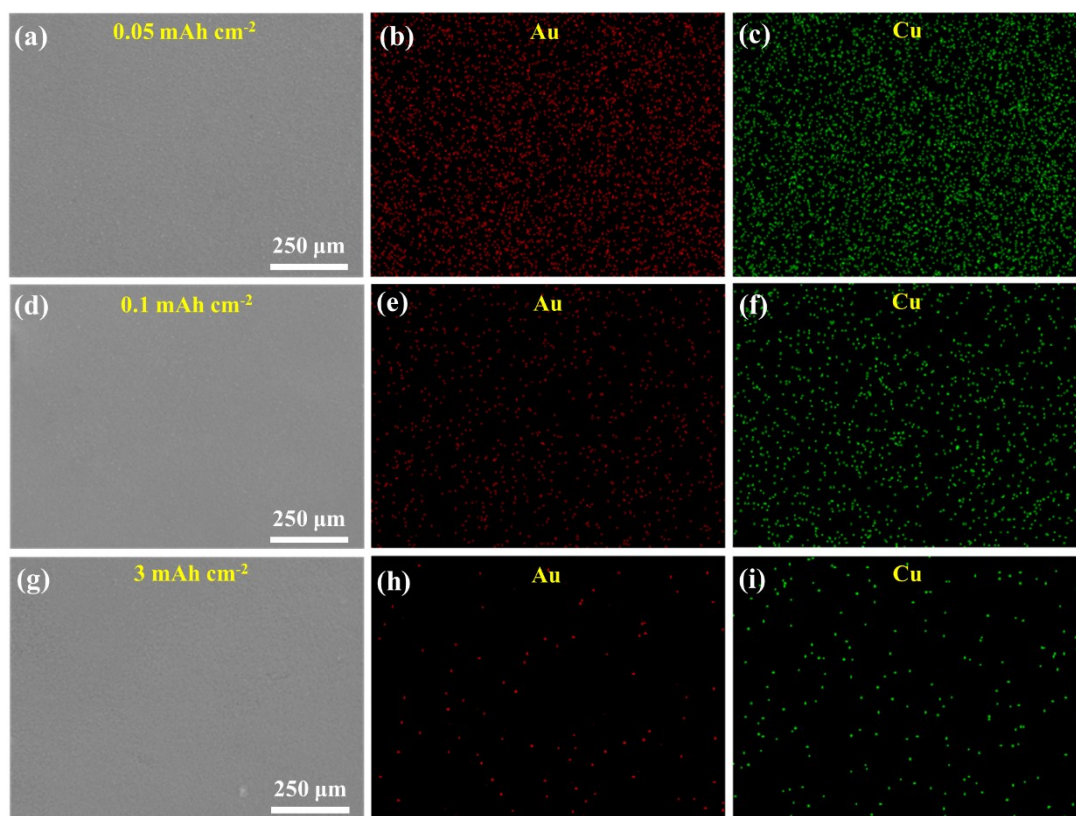

**Fig. S6†** The EDS mapping result of Au and Cu elements on the surface of Li/Au/Cu electrode with Li plating capacities of (a-c) 0.05, (d-f) 0.1, and (g-i) 3 mAh cm<sup>-2</sup>, respectively.

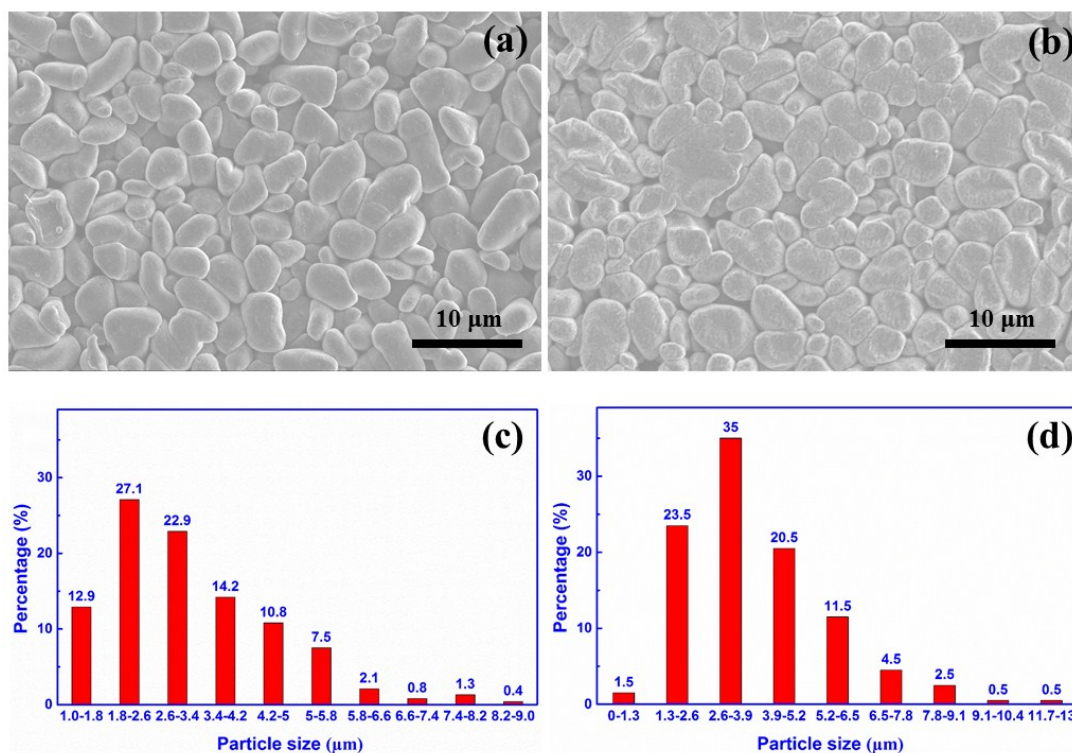

**Fig. S7†** SEM images of (a) untreated Li/Au/Cu and (b) RF-Li/Au/Cu electrodes with low magnification. The particle size distribution of (c) untreated Li/Au/Cu and (d) RF-Li/Au/Cu electrodes was measured by Nano Measure software. For untreated Li/Au/Cu electrode, there are 40% of particles whose size is below 2.6 nm, indicating there is a large number of small particles. In contrast, there is only 25% of particles for RF-Li/Au/Cu electrode whose size is below 2.6 nm. On the other hand, RF-Li/Au/Cu electrode also has more particles with diameters > 5 nm (more than 19.5%) than that of untreated Li/Au/Cu electrode (only 12.1%).



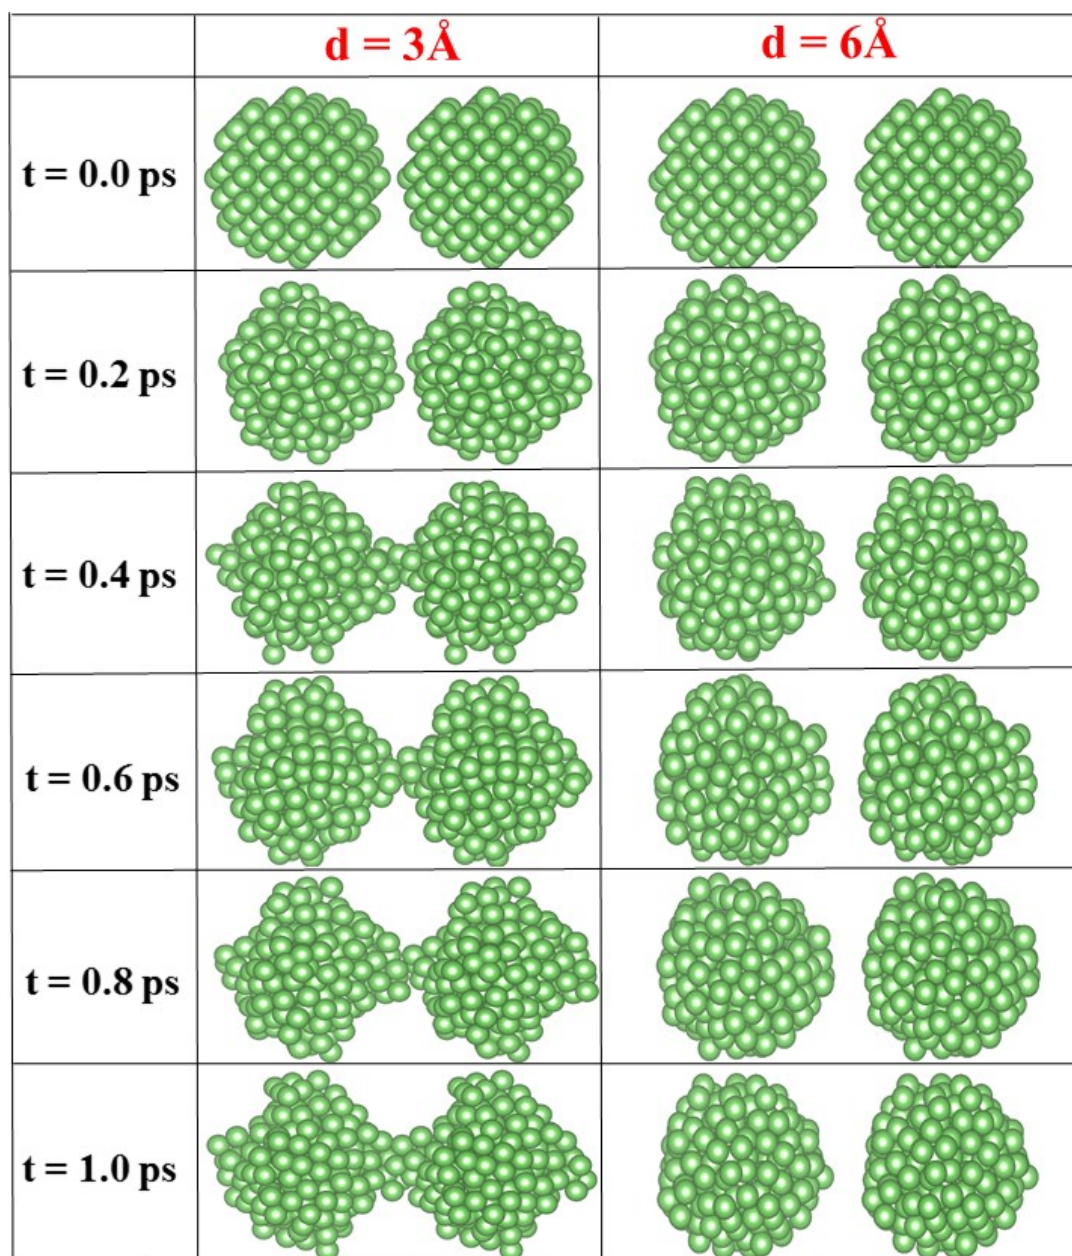

**Fig. S8†** The evolution processes of Li diffusion for  $d=3\text{\AA}$  and  $d=6\text{\AA}$  models using the Ab-initio molecular dynamics simulations. For  $d=3\text{\AA}$  model, there is a tendency that Li particles diffuse into together after 0.4 ps, while those of  $d=6\text{\AA}$  model still in a separate state after 1.0 ps.

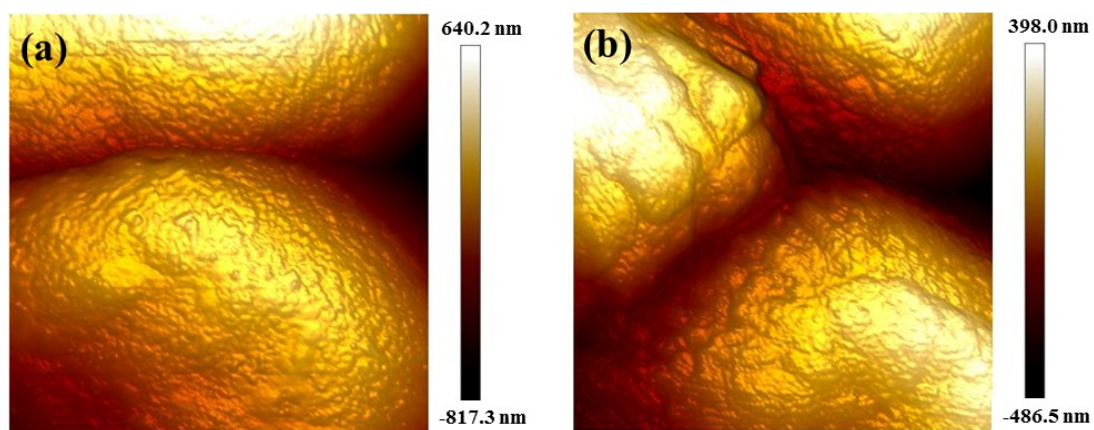

**Fig. S9†** 2D AFM height images of (a) untreated Li/Au/Cu and (b) RF-Li/Au/Cu electrodes.

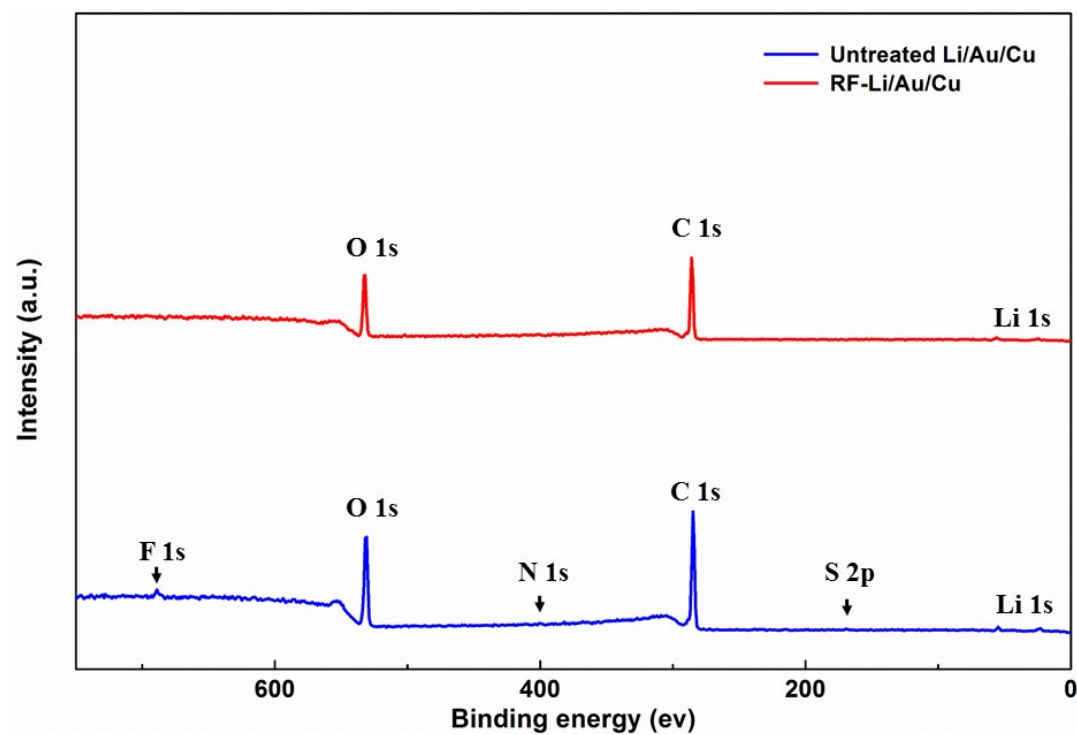

Fig. S10† XPS characterization of the untreated Li/Au/Cu and RF-Li/Au/Cu electrodes.

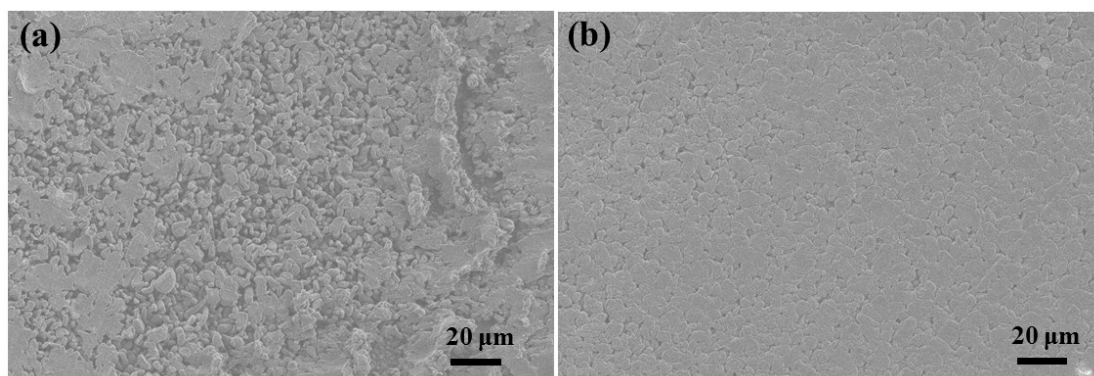

**Fig. S11†** The low-magnification SEM images of (a) untreated Li/Au/Cu and (b) RF-Li/Au/Cu electrodes after the 10<sup>th</sup> Li plating with a current density of 1 mA cm<sup>-2</sup>.

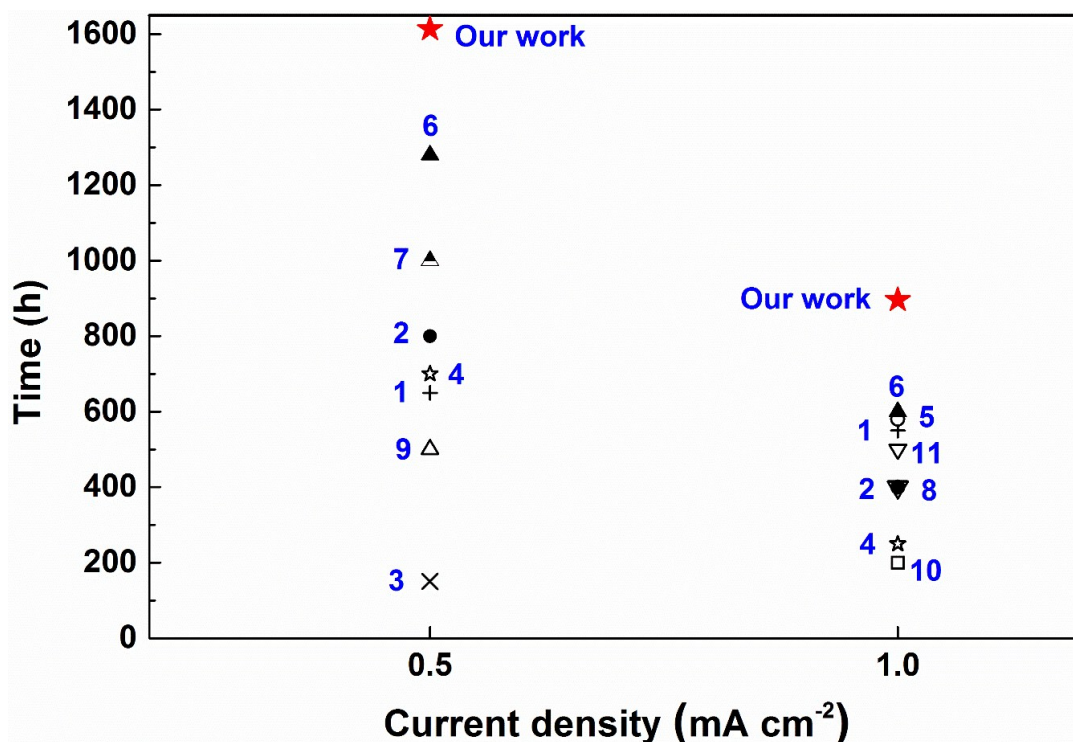

**Fig. S12†** Comparison of cycling performance of our data and the results reported by other groups under the current density of 0.5 mA cm<sup>-2</sup> or 1 mA cm<sup>-2</sup> with a capacity of 1 mAh cm<sup>-2</sup>.

## References

- 1 S. J. Zhang, Z. G. Gao, W. W. Wang, Y. Q. Lu, Y. P. Deng, J. H. You, J. T. Li, Y. Zhou, L. Huang, X. D. Zhou, S. G. Sun, *Small*, 2018, 1801054.
- 2 F. Q. Liu, W. P. Wang, Y. X. Yin, S. F. Zhang, J. L. Shi, L. Wang, X. D. Zhang, Y. Zheng, J. J. Zhou, L. Li, Y. G. Guo, *Sci. Adv.*, 2018, **4**, eaat5383.
- 3 Y. Gao, Y. Zhao, Y. C. Li, Q. Huang, T. E. Mallouk, D. Wang, *J. Am. Chem. Soc.*, 2017, **139**, 15288-15291.
- 4 N. W. Li, Y. Shi, Y. X. Yin, X. X. Zeng, J. Y. Li, C. J. Li, L. J. Wan, R. Wen, Y. G. Guo, *Angew. Chem. Int. Ed. Engl.*, 2018, **57**, 1505-1509.
- 5 W. Tang, X. S. Yin, Z. X. Chen, W. Fu, K. P. Loh, G. W. Zheng, *Energy Storage Mater.*, 2018, **14**, 289-296.
- 6 Q. Li, S. P. Zhu, Y. Y. Lu, *Adv. Funct. Mater.*, 2017, **27**, 1606422.
- 7 Q. Song, H. Yan, K. Liu, K. Xie, W. Li, W. Gai, G. Chen, H. Li, C. Shen, Q. Fu, S. Zhang, L. Zhang, B. Wei, *Adv. Energy Mater.*, 2018, **8**, 1800564.
- 8 H. Zhao, D. N. Lei, Y. B. He, Y. F. Yuan, Q. B. Yun, B. Ni, W. Lv, B. H. Li, Q. H. Yang, F. Y. Kang, J. Lu, *Adv. Energy Mater.*, 2018, **8**, 1800266.
- 9 C. Yang, Y. Yao, S. He, H. Xie, E. Hitz, L. Hu, *Adv. Mater.*, 2017, **29**, 1702714.
- 10 D. Wang, C. Luan, W. Zhang, X. Liu, L. Sun, Q. Liang, T. Qin, Z. Zhao, Y. Zhou, P. Wang, W. Zheng, *Adv. Energy Mater.*, 2018, **8**, 1800650.
- 11 Y. Wang, Z. Wang, D. Lei, W. Lv, Q. Zhao, B. Ni, Y. Liu, B. Li, F. Kang, Y. B. He, *ACS Appl. Mater. Interfaces*, 2018, **10**, 20244-20249.

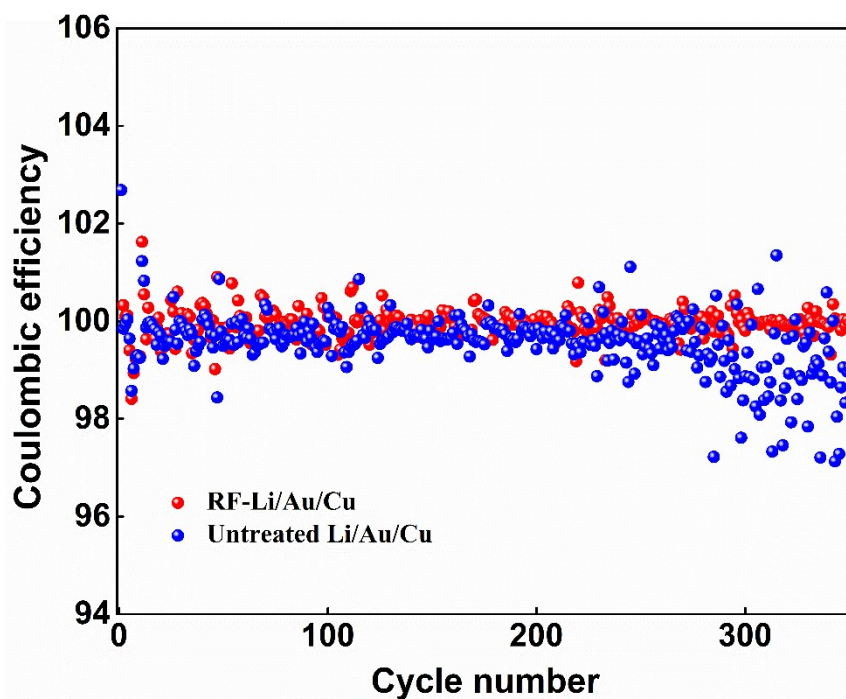

**Fig. S13†** Coulombic efficiency of LiFePO<sub>4</sub> full cells with RF-Li/Au/Cu and untreated Li/Au/Cu electrodes at 1 C rate.

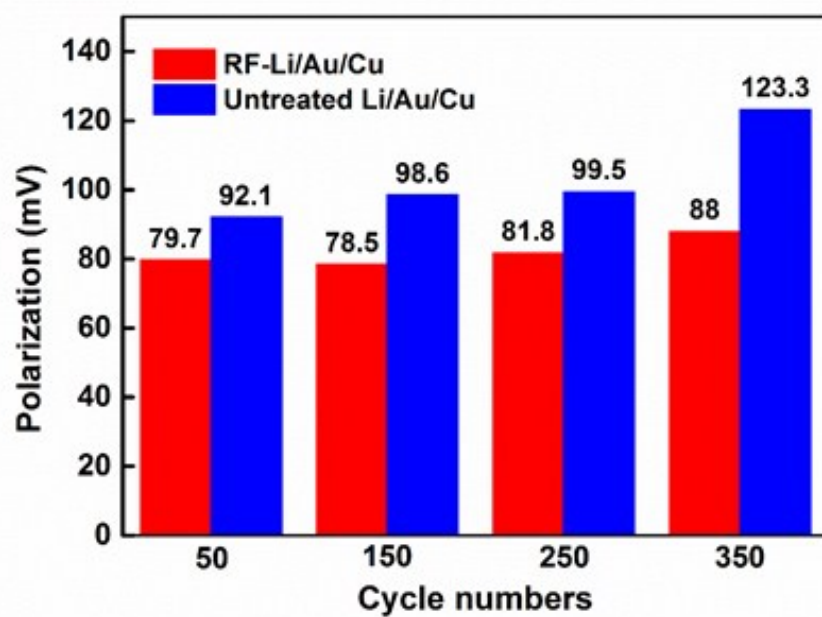

**Fig. S14†** Polarization comparison of LiFePO<sub>4</sub> full cells with untreated Li/Au/Cu and RF-Li/Au/Cu electrodes.
